# Supplementary material for: Comparative outcome analysis of bleb needling of fibrotic blebs in the clinic versus the operating room: a retrospective case series
Source: Springer Nature journal article supplement (doi:10.1186/s12886-021-01870-1), 2021-03-04
Supplement: MOESM1 [file 18929286]

---

**Supplemental Table 1:** Bleb revision success rate after > 1 needling procedures at each time point.

---

|                | <b>1w</b> | <b>1m</b> | <b>2m</b> | <b>6m</b> |
|----------------|-----------|-----------|-----------|-----------|
| Clinic         | 40% (2/5) | 20% (1/5) | 20% (1/5) | 20% (1/5) |
| OR             | 50% (2/4) | 50% (2/4) | 0% (0/4)  | 0% (0/4)  |
| Trabeculectomy | 33% (1/3) | 33% (1/3) | 0% (0/3)  | 0% (0/3)  |
| ExPress        | 50% (1/2) | 50% (1/2) | 0% (0/2)  | 0% (0/2)  |
| XEN            | 50% (2/4) | 25% (1/4) | 25% (1/4) | 25% (1/4) |

---

Abbreviations: w = week, m = month(s)

---
