# Supplementary material for: Comparative outcome analysis of bleb needling of fibrotic blebs in the clinic versus the operating room: a retrospective case series
Source: Springer Nature journal article supplement (doi:10.1186/s12886-021-01870-1), 2021-03-04
Supplement: MOESM2 [file 18929286]

**Supplemental Table 2: Mean IOP and number of medications**

| <b>Mean IOP (SE)</b>         | <b>1w</b>  | <b>1m</b>  | <b>2m</b>  | <b>6m</b>  |
|------------------------------|------------|------------|------------|------------|
| Clinic                       | 15.4 (1.6) | 16.3 (1.2) | 14.7 (1.2) | 14.2 (0.8) |
| OR                           | 15.4 (2.1) | 17.5 (1.9) | 17.5 (1.8) | 14.9 (1.8) |
| P-value                      | 0.990      | 0.595      | 0.212      | 0.731      |
| Trabeculectomy               | 14.7 (2.2) | 17.8 (2.5) | 15.1 (1.8) | 13.4 (0.9) |
| ExPress                      | 15 (1.8)   | 15.4 (2.1) | 16.2 (2.3) | 14.5 (1.4) |
| XEN                          | 16.2 (2.5) | 16.9 (1.4) | 16.3 (1.5) | 15.1 (1.2) |
| P-value                      | 0.871      | 0.711      | 0.883      | 0.688      |
| <b>Mean Medications (SE)</b> | <b>1w</b>  | <b>1m</b>  | <b>2m</b>  | <b>6m</b>  |
| Clinic                       | 1 (0.3)    | 1.3 (0.3)  | 1.4 (0.3)  | 1.4 (0.3)  |
| OR                           | 0.8 (0.4)  | 1 (0.4)    | 1.5 (0.4)  | 1.7 (0.5)  |
| P-value                      | 0.674      | 0.628      | 0.829      | 0.586      |
| Trabeculectomy               | 0.3 (0.3)  | 0.3 (0.3)  | 1 (0.5)    | 1.1 (0.5)  |
| ExPress                      | 1.1 (0.5)  | 1 (0.5)    | 1.6 (0.4)  | 1.4 (0.4)  |
| XEN                          | 1.2 (0.3)  | 1.7 (0.3)  | 1.6 (0.4)  | 1.9 (0.5)  |
| P-value                      | 0.244      | 0.060      | 0.549      | 0.475      |

Abbreviations: SE = standard error, w = week, m = month(s).
