# Supplementary material for: Comparative outcome analysis of bleb needling of fibrotic blebs in the clinic versus the operating room: a retrospective case series
Source: Springer Nature journal article supplement (doi:10.1186/s12886-021-01870-1), 2021-03-04
Supplement: MOESM3 [file 18929286]

---

**Supplemental Table 3: Multinomial logistic regression for 6 month success**

---

|                                      | B      | Odds Ratio | SE    | P-value | Lower Bound | Upper Bound |
|--------------------------------------|--------|------------|-------|---------|-------------|-------------|
| Intercept                            | -0.314 |            | 1.555 | 0.840   |             |             |
| Baseline IOP                         | 0.039  | 1.040      | 0.053 | 0.461   | 0.937       | 1.155       |
| Baseline Medications                 | 0.246  | 1.279      | 0.251 | 0.328   | 0.782       | 2.092       |
| Clinic (compared to OR)              | -0.771 | 0.462      | 0.913 | 0.398   | 0.077       | 2.769       |
| ExPress (compared to Trabeculectomy) | 0.056  | 1.058      | 0.894 | 0.736   | 0.184       | 2.092       |
| XEN (compared to Trabeculectomy)     | 1.806  | 6.087      | 1.159 | 0.119   | 0.628       | 58.968      |

---

Abbreviations: IOP = intraocular pressure, SE = Standard error

---
