# Supplementary material for: Comparative outcome analysis of bleb needling of fibrotic blebs in the clinic versus the operating room: a retrospective case series
Source: Springer Nature journal article supplement (doi:10.1186/s12886-021-01870-1), 2021-03-04
Supplement: MOESM4 [file 18929286]

---

**Supplemental Table 4: RENEEDLING RATE<sup>a</sup>**

---

|                   |                             |
|-------------------|-----------------------------|
| Clinic            | 25% (8/32)                  |
| OR                | 7% (1/15)                   |
|                   | P = 0.136                   |
| Trabeculectomy    | 22% (2/14)                  |
| ExPress           | 13% (2/16)                  |
| XEN               | 18% (3/17)                  |
|                   | P = 0.915                   |
| XEN Needling Rate | 53.1% (17/32 <sup>b</sup> ) |

---

<sup>a</sup>Rate of repeat bleb needling events within 3 months of most recent needling.

<sup>b</sup>Total of all XEN gel stents performed within study dates that required needling.

---
